# Supplementary material
Source: Springer Nature journal article supplement (https://www.springermedizin.de/resource/supplementary/13063_2012_1035_MOESM2_ESM.pdf/9619370)

# Accrual of sites and patients

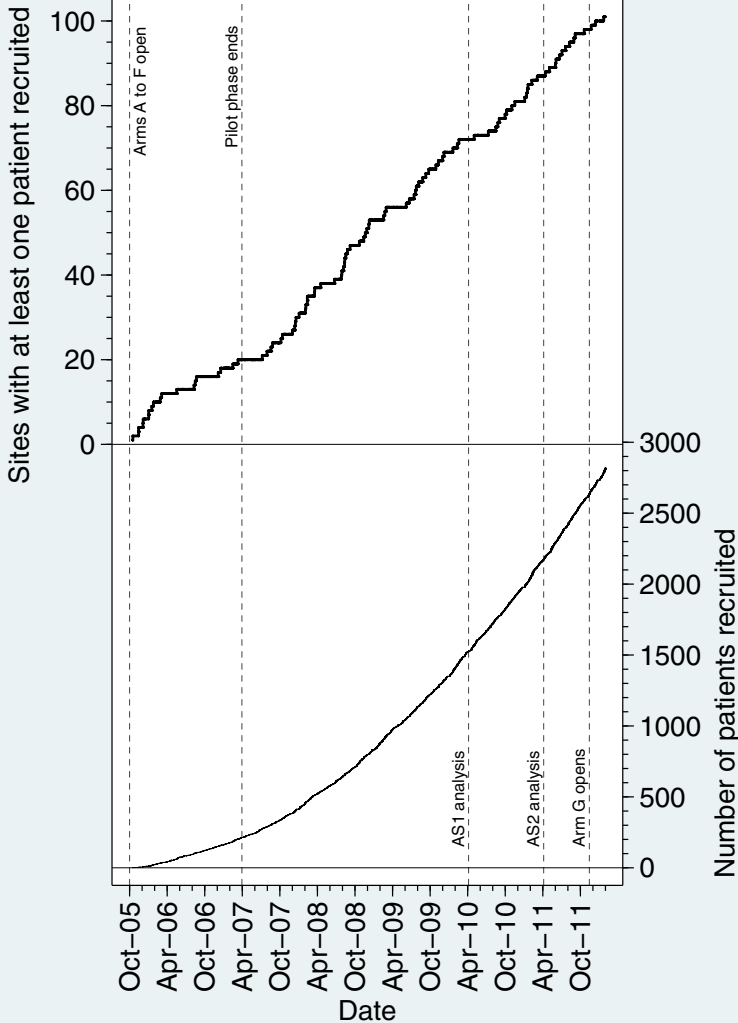

— Centres (L)      — Patients (R)

Supplement: MOESM2 [file 9619370]
